# Supplementary material for: Correlations among Brain Gray Matter Volumes, Age, Gender, and Hemisphere in Healthy Individuals
Source: PLoS One. 2011 Jul 27;6(7):e22734. doi: 10.1371/journal.pone.0022734 (PMC3144937; doi:10.1371/journal.pone.0022734)
Supplement: Table S7 — Effects of age, gender, and hemisphere, and interactions of age × gender, age × hemisphere, and age × gender × hemisphere on regional gray matter volume in each structure by effect size using partial η 2. Intracranial volume is used as a covariate. In the gender column, bold type represents significantly larger gray matter volume in the region among women than among men. In the hemisphere column, bold type represents significant leftward asymmetry (left > right) in the gray matter volume in the region. (DOC) [file pone.0022734.s007.doc]

Table S7. Effects of age, gender, and hemisphere, and interactions of age × gender, age × hemisphere, and age × gender × hemisphere on regional gray matter volume in each structure by effect size using partial *η*2. Intracranial volume is used as a covariate. In the gender column, bold type represents significantly larger gray matter volume in the region among women than among men. In the hemisphere column, bold type represents significant leftward asymmetry (left > right) in the gray matter volume in the region.

| Structure | Grapha | Effect size |  |  |  |  |  |
| --- | --- | --- | --- | --- | --- | --- | --- |
|  |  | Age (A) | Gender (G) | Hemisphere (H) | A × G | A × H | A ×G × H |
| Precentral gyrus | Fig. 9, (B) | 0.514** | **0.008**** | 0.003* | 0.049** | 0.003 | 0.003 |
| Middle frontal gyrus | Fig. 9, (G) | 0.504** | 0.001 | 0.004** | 0.053** | 0.002 | 0.003 |
| Postcentral gyrus | Fig. 9, (D) | 0.444** | **0.019**** | 0.010** | 0.042** | 0.004 | 0.003 |
| Insula | Fig. 10, (G) | 0.441** | **0.064**** | 0 | 0.038** | 0.004 | 0.002 |
| Inferior parietal lobule | Fig. 9, (F) | 0.418** | **0.105**** | 0.011** | 0.025* | 0.004 | 0.002 |
| Superior frontal gyrus | Fig. 9, (A) | 0.400** | 0 | 0.076** | 0.039** | 0.002 | 0.002 |
| Inferior frontal gyrus | Fig. 9, (L) | 0.377** | 0 | 0.003* | 0.040** | 0.005 | 0.002 |
| Anterior cingulate cortex | Fig. 10, (F) | 0.321** | **0.009**** | 0.033** | 0.040** | 0.001 | 0.001 |
| Superior parietal lobule | Fig. 9, (C) | 0.313** | 0.001 | **0.005**** | 0.033** | 0.002 | 0.003 |
| Superior temporal gyrus | Fig. 9, (J) | 0.286** | **0.049**** | 0.018** | 0.039** | 0.002 | 0.003 |
| Supramerginal gyrus | Fig. 9, (E) | 0.283** | **0.213**** | 0.016** | 0.025* | 0.005 | 0.003 |
| Precuneus | Fig. 10, (C) | 0.277** | **0.045**** | **0.012**** | 0.042** | 0.002 | 0.001 |
| Angular gyrus | Fig. 9, (I) | 0.258** | **0.188**** | **0.031**** | 0.032** | 0.004 | 0.004 |
| Medial superior frontal gyrus | Fig. 10, (A) | 0.227** | 0.003* | 0 | 0.031** | 0.001 | 0.001 |
| Caudate nucleus | Fig. 10, (H) | 0.223** | **0.028**** | 0.020** | 0.039** | 0.004 | 0.002 |
| Orbital gyrus | Fig. 10, (L) | 0.181** | 0.035** | 0.060** | 0.029* | 0.002 | 0.003 |
| Paracentral lobule | Fig. 9, (H) | 0.180** | 0.001 | **0.016**** | 0.038** | 0.002 | 0.002 |
| Superior occipital gyrus | Fig. 10, (K) | 0.180** | **0.148**** | **0.257**** | 0.051** | 0.006 | 0.007 |
| Fusiform gyrus | Fig. 10, (O) | 0.174** | 0.033** | **0.035**** | 0.070** | 0.002 | 0.002 |
| Middle temporal gyrus | Fig. 9, (M) | 0.172** | **0.012**** | **0.011**** | 0.044** | 0.003 | 0.006 |
| Middle occipital gyrus | Fig. 9, (K) | 0.160** | **0.009**** | **0.213**** | 0.035** | 0.005 | 0.004 |
| Cuneus | Fig. 10, (E) | 0.157** | **0.011**** | **0.092**** | 0.065** | 0.002 | 0.003 |
| Cingulate cortex | Fig. 10, (D) | 0.152** | **0.024**** | 0.007** | 0.040** | 0.001 | 0.001 |
| Inferior occipital gyrus | Fig. 9, (N) | 0.147** | 0.029** | **0.042**** | 0.069** | 0.003 | 0.004 |
| Lingual gyrus | Fig. 10, (J) | 0.145** | 0.106** | **0.010**** | 0.059** | 0.003 | 0.002 |
| Anterior lobe of the cerebellum | Fig. 9, (Q) | 0.145** | 0.006** | 0.002* | 0.049** | 0.002 | 0.002 |
| Rectal gyrus | Fig. 10, (M) | 0.139** | 0.067** | 0.010** | 0.030** | 0.001 | 0.002 |
| Parahippocampal gyrus | Fig. 10, (N) | 0.131** | 0.147** | 0.002 | 0.060** | 0.004 | 0.004 |
| Posterior lobe of the cerebellum | Fig. 9, (R) | 0.131** | 0.038** | 0 | 0.030* | 0.003 | 0.003 |
| Inferior temporal gyrus | Fig. 9, (O, P) | 0.110** | 0.151** | 0.020** | 0.040** | 0.013 | 0.176** |
| Thalamus | Fig. 10, (I) | 0.070** | **0.034**** | 0.036** | 0.036** | 0.001 | 0.002 |
| Posterior cingulate cortex | Fig. 10, (B) | 0.046** | 0.002* | 0.039** | 0.040** | 0.002 | 0.002 |

a: Correspondence with the graphs in Figures 9 and 10

**P* < 0.05; ***P* < 0.002. Bonferroni critical α = 0.002.
